# Supplementary material for: A novel sprayable thermosensitive hydrogel coupled with zinc modified metformin promotes the healing of skin wound
Source: PubMed Central journal article supplement — Bioact Mater. 2022 Jul 1;20:610–26. doi: 10.1016/j.bioactmat.2022.06.008 (PMC9256661; doi:10.1016/j.bioactmat.2022.06.008), 2022-07-01
Supplement: mmc1.pdf [file mmc1.pdf]

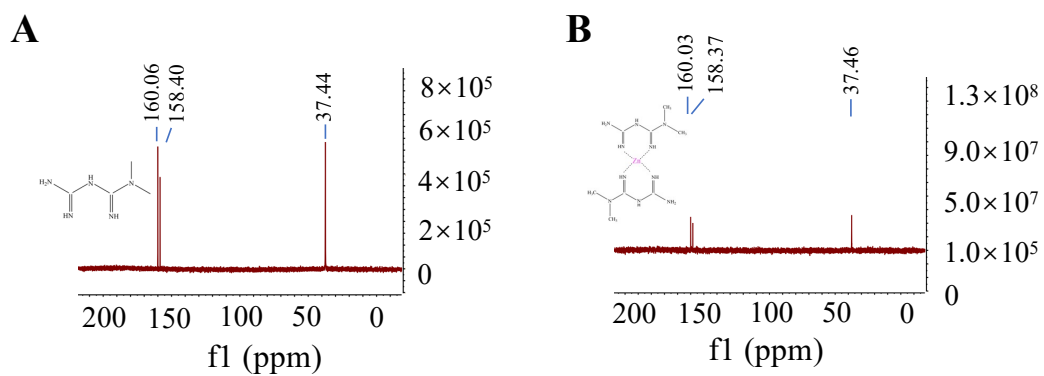

**Fig. S1  $^{13}\text{C}$  NMR analyses of Met and ZnMet.**  
 $^{13}\text{C}$  NMR analyses of Met (A) and ZnMet (B).

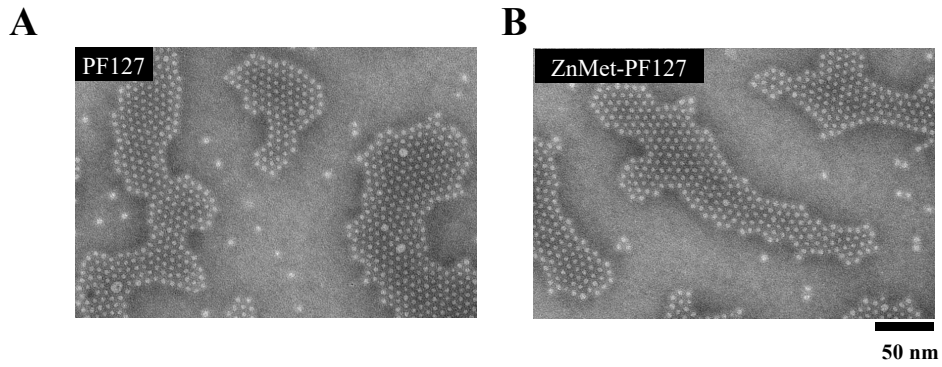

**Fig. S2 TEM analyses of PF127 and ZnMet-PF127.**  
Representative TEM images of PF127 (**A**) and ZnMet-PF127 (**B**) using negative staining.

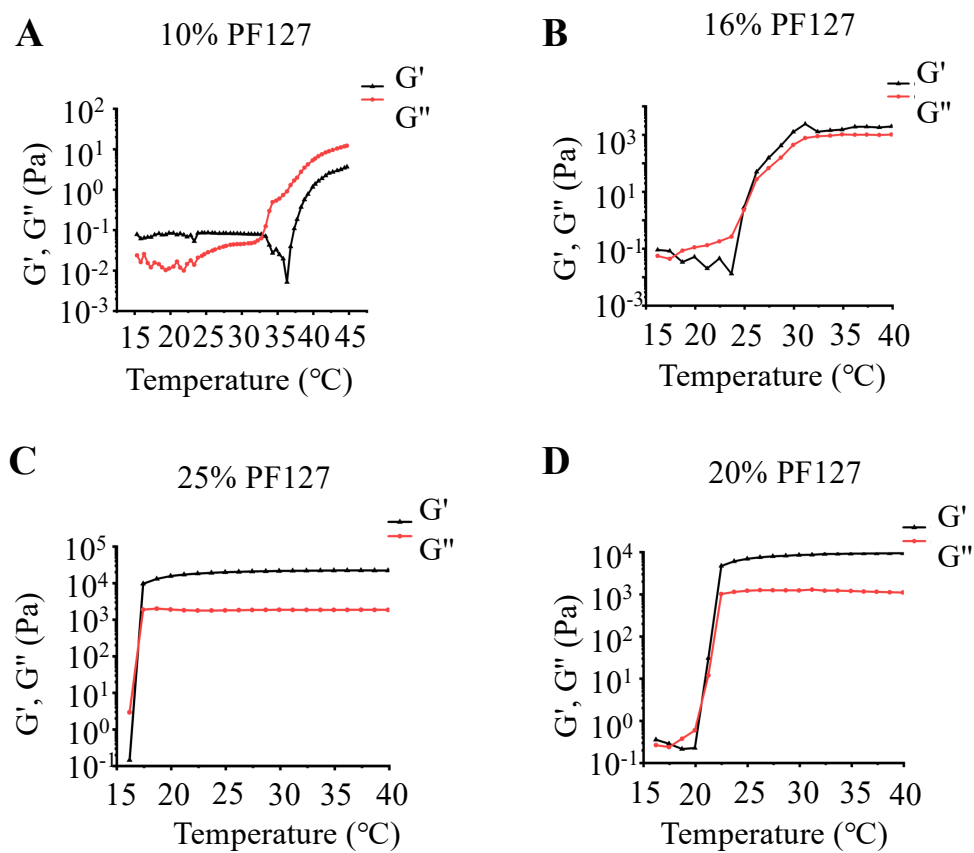

**Fig. S3 Characterization of ZnMet-PF127.**

**A-D** Rheological behavior of PF127 at different concentrations.  $G'$ , elastic modulus;  $G''$ , viscous modulus.
